# Supplementary material for: Efficient management of the nitritation-anammox microbiome through intermittent aeration: absence of the NOB guild and expansion and diversity of the NOx reducing guild suggests a highly reticulated nitrogen cycle
Source: Environ Microbiome. 2022 Jul 22;17:39. doi: 10.1186/s40793-022-00432-2 (PMC9306079; doi:10.1186/s40793-022-00432-2)
Supplement: Supplementary file 2 — Additional file 2: Table S1: Quality, abundance and taxonomy of the recovered metagenome-assembled genomes. [file 40793_2022_432_MOESM2_ESM.xlsx]

## Sheet: Sheet1
Bin	sample_1	sample_2	sample_3	sample_4	sample_5	sample_6	sample_7	Mean		Bin	Completeness	Contamination	Strain heterogeneity		classification
ACD1	0.372355	0.443461	2.14092	3.12342	4.95179	4.34734	4.77104	2.87862		ACD1	95.73	2.56	0		d__Bacteria;p__Acidobacteriota;c__Blastocatellia;o__Pyrinomonadales;f__Pyrinomonadaceae;g__OLB17;s__
ACD2	0.219539	0.378701	0.577849	0.533617	1.62233	1.27834	0.649443	0.751404		ACD2	95.73	2.56	0		d__Bacteria;p__Acidobacteriota;c__Blastocatellia;o__UBA7656;f__;g__;s__
ACD3	0.296903	0.268143	0.46647	0.518888	0.424533	0.524065	0.351919	0.407274		ACD3	94.87	5.84	0		d__Bacteria;p__Acidobacteriota;c__Blastocatellia;o__Pyrinomonadales;f__Pyrinomonadaceae;g__OLB17;s__
ACT1	0.546472	0.377585	0.29099	0.299763	0.336545	0.348469	0.387694	0.369645		ACT1	46.1	0.43	0		d__Bacteria;p__Actinobacteriota;c__Acidimicrobiia;o__Acidimicrobiales;f__Ilumatobacteraceae;g__Desertimonas;s__
ACT2	0.184731	0.151448	0.184996	0.326305	0.456118	0.425787	0.379617	0.301286		ACT2	43.1	1.72	0		d__Bacteria;p__Actinobacteriota;c__Thermoleophilia;o__Solirubrobacterales;f__70-9;g__CAIUSP01;s__
AMX1	5.59855	4.92758	3.12827	3.43007	2.21253	2.19529	6.36293	3.97932		AMX1	98.9	3.85	25		d__Bacteria;p__Planctomycetota;c__Brocadiae;o__Brocadiales;f__Brocadiaceae;g__Brocadia;s__Brocadia fulgida
AMX2	10.8611	11.3548	25.1749	21.1488	16.2169	14.531	13.1306	16.0597		AMX2	94.51	2.75	0		d__Bacteria;p__Planctomycetota;c__Brocadiae;o__Brocadiales;f__Brocadiaceae;g__Brocadia;s__
AMX3	0.240825	0.410302	0.394245	0.347547	0.305155	0.424977	0.353653	0.353815		AMX3	80.42	2.39	16.67		d__Bacteria;p__Planctomycetota;c__Brocadiae;o__Brocadiales;f__Brocadiaceae;g__Brocadia;s__Brocadia sapporoensis
AOB1	4.12862	5.94027	2.51332	2.97342	2.46376	0.850791	0.422383	2.75608		AOB1	95.58	0.74	0		d__Bacteria;p__Proteobacteria;c__Gammaproteobacteria;o__Burkholderiales;f__Nitrosomonadaceae;g__Nitrosomonas;s__Nitrosomonas eutropha_B
AOB2	6.24606	7.88088	7.05951	15.0486	8.48993	4.75711	3.61422	7.58519		AOB2	97.92	0.15	0		d__Bacteria;p__Proteobacteria;c__Gammaproteobacteria;o__Burkholderiales;f__Nitrosomonadaceae;g__Nitrosomonas;s__Nitrosomonas europaea
AOB3	0.7153	7.74619	1.44073	0.576152	1.96817	1.39827	0.938757	2.11194		AOB3	99.28	0.03	0		d__Bacteria;p__Proteobacteria;c__Gammaproteobacteria;o__Burkholderiales;f__Nitrosomonadaceae;g__Nitrosomonas;s__
ARM1	10.1443	5.15441	3.94948	2.65171	3.8697	1.92878	1.89225	4.22724		ARM1	95.83	0.93	0		d__Bacteria;p__Armatimonadota;c__Fimbriimonadia;o__Fimbriimonadales;f__Fimbriimonadaceae;g__OLB18;s__OLB18 sp001567425
BCD1	4.38672	3.96514	3.0308	1.88767	2.06293	4.74657	0.69155	2.96734		BCD1	98.02	1.98	25		d__Bacteria;p__Bacteroidota;c__Bacteroidia;o__Chitinophagales;f__Saprospiraceae;g__OLB8;s__OLB8 sp001567405
BCD2	0.28624	0.27812	0.471506	0.346823	0.205924	0.271635	0.503008	0.337608		BCD2	90.32	0	0		d__Bacteria;p__Bacteroidota;c__Bacteroidia;o__Flavobacteriales;f__PHOS-HE28;g__PHOS-HE28;s__PHOS-HE28 sp013360395
CFX1	0.509825	0.476427	0.51061	0.458058	0.428584	0.342614	0.256414	0.426076		CFX1	91.54	0.99	0		d__Bacteria;p__Chloroflexota;c__Dehalococcoidia;o__UBA2991;f__UBA2991;g__UCB2;s__UCB2 sp003577245
CFX2	18.4953	8.99375	8.1491	9.88813	7.40585	5.81747	2.19454	8.70631		CFX2	88.64	0.45	0		d__Bacteria;p__Chloroflexota;c__Anaerolineae;o__Anaerolineales;f__EnvOPS12;g__UBA12294;s__UBA12294 sp002050275
CFX3	1.22659	1.21416	1.992	2.26006	1.65857	2.25434	4.29381	2.1285		CFX3	89.09	0.64	0		d__Bacteria;p__Chloroflexota;c__Anaerolineae;o__Anaerolineales;f__EnvOPS12;g__UBA12294;s__
CFX4	1.33513	4.14937	1.45759	1.607	3.69596	7.50406	9.58369	4.1904		CFX4	90	4.55	0		d__Bacteria;p__Chloroflexota;c__Anaerolineae;o__Anaerolineales;f__UBA11579;g__;s__
CFX5	0.337957	0.6441	0.519196	0.312795	0.34023	0.590938	0.639826	0.483577		CFX5	81.82	2.88	0		d__Bacteria;p__Chloroflexota;c__Anaerolineae;o__Anaerolineales;f__EnvOPS12;g__OLB14;s__OLB14 sp900696595
CFX6	0.744705	1.24023	1.31342	1.19642	0.872629	1.34536	2.64392	1.33667		CFX6	96.36	0	0		d__Bacteria;p__Chloroflexota;c__Anaerolineae;o__SBR1031;f__A4b;g__OLB13;s__OLB13 sp001567485
CFX7	0.108254	0.33946	0.815833	1.13986	0.945502	1.91305	3.20075	1.20896		CFX7	99.09	0	0		d__Bacteria;p__Chloroflexota;c__Anaerolineae;o__SBR1031;f__J027;g__CFX10;s__
CFX8	2.14372	1.98758	0.581002	0.899726	1.71646	2.09978	1.76942	1.59967		CFX8	97.88	2	0		d__Bacteria;p__Chloroflexota;c__Anaerolineae;o__UBA4142;f__SHND01;g__SHND01;s__
CFX9	0.517936	0.589319	0.246374	0.226054	0.271527	0.295404	0.140512	0.326732		CFX9	88.48	2.91	0		d__Bacteria;p__Chloroflexota;c__Anaerolineae;o__UBA4142;f__SHND01;g__SHND01;s__
CFX10	0.405918	0.366165	0.435073	0.357576	0.210076	0.519057	0.50806	0.400275		CFX10	58.38	1.82	50		d__Bacteria;p__Chloroflexota;c__Anaerolineae;o__SBR1031;f__A4b;g__GCA-2702065;s__
CFX11	0.801243	0.553492	0.403436	0.712542	1.18422	1.12174	0.931503	0.815454		CFX11	89.09	2	33.33		d__Bacteria;p__Chloroflexota;c__Anaerolineae;o__Caldilineales;f__JAAEKA01;g__JAAEKA01;s__
CFX12	0.523761	0.304146	1.04795	1.72665	1.81368	2.45752	1.1027	1.28234		CFX12	95.87	5.99	0		d__Bacteria;p__Chloroflexota;c__Anaerolineae;o__UCB3;f__UCB3;g__UCB3;s__UCB3 sp003576755
CFX13	0.0494516	0.0839338	0.205354	0.357436	0.727828	1.13121	1.27208	0.546756		CFX13	97.69	2.97	0		d__Bacteria;p__Chloroflexota;c__Dehalococcoidia;o__DSTF01;f__;g__;s__
CFX14	0.0895064	0.130029	0.30447	0.266033	0.224573	0.2335	0.493158	0.248753		CFX14	84.55	0.91	0		d__Bacteria;p__Chloroflexota;c__Anaerolineae;o__SBR1031;f__UBA2796;g__UBA2796;s__UBA2796 sp002352035
CFX15	0.2524	0.261084	0.284592	0.346525	0.487789	0.652501	0.592905	0.411114		CFX15	36.77	1.82	0		d__Bacteria;p__Chloroflexota;c__Anaerolineae;o__SBR1031;f__UBA2029;g__;s__
CLB1	0.565529	0.642986	0.205612	0.238095	0.172043	0.132307	0.159891	0.302352		CLB1	89.96	1.64	0		d__Bacteria;p__Bacteroidota;c__Kapabacteria;o__Kapabacteriales;f__Kapabacteriaceae;g__OLB6;s__OLB6 sp001567175
CLB2	2.19317	1.53038	2.34268	2.21345	2.27558	2.63022	2.07316	2.17981		CLB2	94.97	0	0		d__Bacteria;p__Bacteroidota;c__Ignavibacteria;o__Ignavibacteriales;f__Ignavibacteriaceae;g__Ignavibacterium;s__Ignavibacterium sp900696555
CLB3	0.730499	0.646961	0.994896	1.01629	0.751295	0.826125	0.860677	0.832391		CLB3	89.94	0.05	0		d__Bacteria;p__Bacteroidota;c__Ignavibacteria;o__Ignavibacteriales;f__Ignavibacteriaceae;g__IGN2;s__IGN2 sp013285405
CLB4	0.158037	0.0621155	0.123171	0.114884	0.629231	2.15272	4.18881	1.06128		CLB4	95.08	0	0		d__Bacteria;p__Bacteroidota;c__Ignavibacteria;o__SJA-28;f__B-1AR;g__OLB4;s__OLB4 sp002050165
GMM1	0.457301	0.479807	0.393969	0.302272	0.38409	0.348134	0.193205	0.36554		GMM1	78.02	1.3	0		d__Bacteria;p__Gemmatimonadota;c__Gemmatimonadetes;o__Gemmatimonadales;f__Gemmatimonadaceae;g__JABWBJ01;s__
GMM2	0.606995	0.405848	0.23078	0.265503	0.643269	0.128481	0.026826	0.329672		GMM2	30.22	1.1	0		d__Bacteria;p__Gemmatimonadota;c__Gemmatimonadetes;o__Gemmatimonadales;f__GWC2-71-9;g__;s__
PAT1	5.95374	6.12019	0.572534	1.62064	5.00371	2.71132	0.414157	3.19947		PAT1	79.15	1.72	0		d__Bacteria;p__Patescibacteria;c__Dojkabacteria;o__SC72;f__SC72;g__;s__
PAT2	0.6925	0.687768	0.206055	0.318164	1.24799	0.837158	0.250186	0.605689		PAT2	72	0	0		d__Bacteria;p__Patescibacteria;c__Dojkabacteria;o__B142;f__;g__;s__
PAT3	1.75345	7.22269	3.84643	1.96597	3.05552	3.15443	0.701417	3.09999		PAT3	68.81	0	0		d__Bacteria;p__Patescibacteria;c__UBA1384;o__2-12-FULL-50-11;f__2-12-FULL-50-11;g__CAIMEH01;s__
PAT4	0.206613	0.184267	0.687939	0.377933	0.282048	0.292331	0.181043	0.316025		PAT4	47.44	0.85	0		d__Bacteria;p__Patescibacteria;c__Microgenomatia;o__UBA1400;f__PJMF01;g__;s__
PLA1	0.223415	0.198961	0.311053	0.189964	0.0987632	0.124208	0.196187	0.191793		PLA1	64.2	2.27	0		d__Bacteria;p__Planctomycetota;c__UBA8742;o__UBA2392;f__UBA2392;g__UBA2392;s__UBA2392 sp002343805
PRO1	0.651184	0.405208	3.43959	0.707906	0.235235	0.202264	0.0946144	0.819429		PRO1	97.08	1.19	14.29		d__Bacteria;p__Bdellovibrionota;c__Bdellovibrionia;o__Bdellovibrionales;f__Bdellovibrionaceae;g__;s__
PRO2	0.287649	0.80357	0.388422	0.647101	4.24759	6.29724	8.01192	2.95478		PRO2	95.44	1.59	0		d__Bacteria;p__Proteobacteria;c__Alphaproteobacteria;o__Micavibrionales;f__Micavibrionaceae;g__;s__
PRO3	1.64633	0.904852	1.04552	0.809409	0.96394	0.851828	0.843113	1.00928		PRO3	99.12	1.71	0		d__Bacteria;p__Proteobacteria;c__Gammaproteobacteria;o__Burkholderiales;f__Burkholderiaceae;g__SCN-69-89;s__
PRO4	1.91998	1.08628	2.89383	1.4884	1.08352	0.431219	0.0991565	1.28605		PRO4	94.59	0.77	0		d__Bacteria;p__Proteobacteria;c__Gammaproteobacteria;o__Xanthomonadales;f__SZUA-5;g__;s__
PRO5	4.62306	4.00051	7.60505	7.08057	6.32375	7.29256	9.43353	6.62272		PRO5	88.59	1.04	25		d__Bacteria;p__Proteobacteria;c__Gammaproteobacteria;o__Burkholderiales;f__Rhodocyclaceae;g__UTPRO2;s__UTPRO2 sp002066955
PRO6	1.83529	1.29111	2.76376	2.44749	2.00952	2.05961	3.05119	2.20828		PRO6	98.13	2.52	0		d__Bacteria;p__Proteobacteria;c__Gammaproteobacteria;o__Burkholderiales;f__Burkholderiaceae;g__Aquabacterium_A;s__Aquabacterium_A sp008933545
PRO7	0.618755	0.517438	1.0635	1.08179	0.882075	1.11282	1.77639	1.00754		PRO7	81.68	2.71	50		d__Bacteria;p__Proteobacteria;c__Gammaproteobacteria;o__Xanthomonadales;f__Rhodanobacteraceae;g__Dokdonella_A;s__Dokdonella_A sp014338185
PRO8	0.0157573	0.0130437	0.0156088	0.0155403	0.0169924	0.248775	1.48705	0.258967		PRO8	83.26	1.81	20		d__Bacteria;p__Myxococcota;c__Polyangia;o__Haliangiales;f__Haliangiaceae;g__WYBA01;s__WYBA01 sp011526095
PRO9	0.667533	0.539582	0.502367	0.618583	0.468845	0.435816	0.402051	0.519254		PRO9	88.82	5.79	0		d__Bacteria;p__Proteobacteria;c__Gammaproteobacteria;o__GCA-2729495;f__GCA-2729495;g__QUBU01;s__QUBU01 sp011526045
PRO10	0.355206	0.255346	0.241418	0.205618	0.179397	0.164094	0.176926	0.225429		PRO10	16.61	0	0		d__Bacteria;p__Proteobacteria;c__Gammaproteobacteria;o__Burkholderiales;f__Burkholderiaceae;g__Rubrivivax;s__
PRO11	0.415	0.341	0.159027	0.105447	0.136579	0.304538	0.38389	0.26364		PRO11	44.11	0.3	0		d__Bacteria;p__Proteobacteria;c__Alphaproteobacteria;o__Rhodobacterales;f__Rhodobacteraceae;g__JACIYW01;s__
PRO12	0.58726	0.292074	0.394177	0.297856	0.282342	0.291724	0.38636	0.361685		PRO12	85.01	9	0		d__Bacteria;p__Proteobacteria;c__Gammaproteobacteria;o__Burkholderiales;f__Casimicrobiaceae;g__VBCG01;s__
VER1	0.341755	0.213733	0.0852177	0.124758	0.177209	0.1068	0.143562	0.170434		VER1	55.6	0.03	0		d__Bacteria;p__Verrucomicrobiota;c__Verrucomicrobiae;o__Chthoniobacterales;f__Terrimicrobiaceae;g__;s__
VER2	0.318498	0.230848	0.272488	0.610595	0.650084	0.421144	0.167763	0.381631		VER2	62.16	1.35	0		d__Bacteria;p__Verrucomicrobiota;c__Verrucomicrobiae;o__Chthoniobacterales;f__JACTMZ01;g__JACTMZ01;s__
VER3	0.405968	0.313123	0.124963	0.168076	0.229611	0.135219	0.224549	0.228787		VER3	72.61	0.9	0		d__Bacteria;p__Verrucomicrobiota;c__Verrucomicrobiae;o__Chthoniobacterales;f__Terrimicrobiaceae;g__;s__
